# Supplementary material for: Antiradical Activity of Beetroot (Beta vulgaris L.) Betalains
Source: MDPI journal article supplement (doi:10.3390/molecules26092439), 2021-04-22
Supplement: s1 [file s1]

# Antiradical Activity of Beetroot (*Beta vulgaris* L.) Betalains

Maciej Spiegel <sup>1,\*</sup>, Andrzej Gamian <sup>2</sup> and Zbigniew Sroka <sup>1</sup>

<sup>1</sup> Department of Pharmacognosy and Herbal Mediciens, Wrocław Medical University, Borowska 211A, 50-556 Wrocław, Poland; maciej.spiegel@student.umed.wroc.pl (M.S.), zbigniew.sroka@umed.wroc.pl (Z.S.)

<sup>2</sup> Ludwik Hirsfeld Institute of Immunology and Experimental Therapy, Polish Academy of Sciences, Rudolfa Weigla 12, 53-114 Wrocław, Poland; andrzej.gamian@hirsfeld.pl (A.G.)

\* Correspondence: maciej.spiegel@student.umed.wroc.pl

**Table S1.** Gibbs Free Energies of Consecutive Deprotonation Steps. [kcal/mol].

| Compound        |      | pK <sub>a1</sub> | pK <sub>a2</sub> | pK <sub>a3</sub> | pK <sub>a4</sub> | pK <sub>a5</sub> |
|-----------------|------|------------------|------------------|------------------|------------------|------------------|
| Betalamic acid  | C2   | 273.96           | 274.69           |                  |                  |                  |
|                 | C6   | 269.05           | —                |                  |                  |                  |
| Betanidin       | C2   | 268.77           | 268.34           | —                | —                | —                |
|                 | C6   | 265.42           | —                | —                | —                | —                |
|                 | C2'' | 268.34           | 271.51           | 273.26           | —                | —                |
|                 | C5'' | 280.19           | 280.96           | 283.68           | 284.56           | —                |
|                 | C6'' | 284.31           | 286.09           | 288.55           | 288.86           |                  |
| Betaxanthin     | C2   | 274.50           | 276.01           | —                |                  |                  |
|                 | C6   | 270.63           | —                | —                |                  |                  |
|                 | C4'' | 291.57           | 291.75           | 292.18           |                  |                  |
| Indicaxanthin   | C2   | 267.37           | 272.50           | 272.55           |                  |                  |
|                 | C6   | 267.55           | 268.33           | —                |                  |                  |
|                 | C2'' | 270.16           | —                | —                |                  |                  |
| Vulgaxanthin I  | C2   | 273.02           | 275.28           | —                |                  |                  |
|                 | C6   | 268.97           | —                | —                |                  |                  |
|                 | C1'' | 276.99           | 277.41           | 277.92           |                  |                  |
| Vulgaxanthin II | C2   | 274.65           | 275.94           | —                | —                |                  |
|                 | C6   | 267.52           | —                | —                | —                |                  |
|                 | C1'' | 275.53           | 276.64           | 277.17           | —                |                  |
|                 | C5'' | —                | 281.50           | 281.07           | 284.48           |                  |

**Table S2.** Estimated Condensed Fukui Functions (*f*<sup>•</sup>) for Radical Attack.

| Compound       | N1   | C2    | C3   | C4    | C5   | C6    | C1'  | C2'   |
|----------------|------|-------|------|-------|------|-------|------|-------|
| Betalamic acid | 0.22 | −0.11 | 0.10 | −0.23 | 0.29 | 0.04  | 0.37 | 0.01  |
| Betanidin      | 0.06 | −0.02 | 0.03 | −0.05 | 0.12 | 0.13  | 0.19 | 0.05  |
| Betaxanthin    | 0.24 | 0.02  | 0.27 | −0.11 | 0.03 | −0.14 | 0.33 | −0.05 |
| Indicaxanthin  | 0.12 | −0.07 | 0.11 | −0.10 | 0.21 | 0.09  | 0.19 | 0.19  |
| Vulgaxanthin I | 0.20 | −0.06 | 0.14 | −0.19 | 0.28 | 0.04  | 0.36 | 0.37  |

|                 |      |       |      |       |      |      |      |       |
|-----------------|------|-------|------|-------|------|------|------|-------|
| Vulgaxanthin II | 0.23 | −0.12 | 0.11 | −0.20 | 0.29 | 0.03 | 0.37 | −0.02 |
|-----------------|------|-------|------|-------|------|------|------|-------|

**Table S3.** XYZ Coordinates of The Most Stable Betalain Conformer and Its Ion Preferred at Physiological pH.

| Compound       |               | Molecule      |               |               | Ion           |               |               |               |
|----------------|---------------|---------------|---------------|---------------|---------------|---------------|---------------|---------------|
| Betalamic acid | C             | -1.0172450000 | 0.9307000000  | 1.3517570000  | C             | 0.7055020000  | 1.2723950000  | -1.2922910000 |
|                | C             | 0.1242890000  | 1.7375290000  | 0.7240500000  | C             | -0.6959700000 | 1.5900450000  | -0.7820580000 |
|                | N             | 1.3182500000  | 0.9190180000  | 0.6585290000  | N             | -1.4833820000 | 0.3725190000  | -0.8093360000 |
|                | C             | 1.1475300000  | -0.3745580000 | 0.2235380000  | C             | -0.9340900000 | -0.7526510000 | -0.3237510000 |
|                | C             | -0.0425450000 | -1.0189900000 | 0.1537170000  | C             | 0.4186310000  | -0.9028500000 | -0.1228140000 |
|                | C             | -1.2472240000 | -0.3644700000 | 0.6110990000  | C             | 1.3241840000  | 0.1203030000  | -0.5317480000 |
|                | C             | -2.5072380000 | -0.8562290000 | 0.4993370000  | C             | 2.6891210000  | 0.1111030000  | -0.3621910000 |
|                | C             | -2.8913270000 | -2.1145040000 | -0.1226750000 | C             | 3.4692190000  | -0.9202140000 | 0.2588260000  |
|                | O             | -2.1518670000 | -2.8863280000 | -0.7203810000 | O             | 3.0576750000  | -1.9735090000 | 0.7583590000  |
|                | C             | 2.3919390000  | -1.1408730000 | -0.1137450000 | C             | -1.9303120000 | -1.8711150000 | 0.0176070000  |
|                | O             | 2.4173720000  | -2.0265490000 | -0.9304520000 | O             | -1.4575510000 | -2.9588230000 | 0.4096850000  |
|                | O             | 3.5014740000  | -0.8045200000 | 0.5499110000  | O             | -3.1412030000 | -1.5826150000 | -0.1261800000 |
|                | C             | -0.2567190000 | 2.2468730000  | -0.6694030000 | C             | -0.6647950000 | 2.2354910000  | 0.6335880000  |
|                | O             | 0.2899140000  | 1.9049110000  | -1.6869330000 | C             | -1.4369920000 | 1.7859040000  | 1.5101380000  |
|                | O             | -1.2602290000 | 3.1293530000  | -0.7184230000 | O             | 0.1262650000  | 3.2018360000  | 0.7667800000  |
|                | H             | -1.9317530000 | 1.5217550000  | 1.3997960000  | H             | 1.3346720000  | 2.1586850000  | -1.2360870000 |
|                | H             | -0.7219490000 | 0.6935800000  | 2.3785640000  | H             | 0.6381870000  | 0.9776100000  | -2.3458920000 |
|                | H             | 2.1221310000  | 1.3996220000  | 0.2637640000  | H             | -2.4865240000 | 0.4419140000  | -0.6845870000 |
|                | H             | -0.0609400000 | -2.0407700000 | -0.1918870000 | H             | 0.7757590000  | -1.8230900000 | 0.3082370000  |
|                | H             | -3.3252570000 | -0.2817240000 | 0.9208010000  | H             | 3.2556560000  | 0.9581090000  | -0.7340410000 |
|                | H             | -3.9614310000 | -2.3614990000 | -0.0305680000 | H             | 4.5544430000  | -0.7215570000 | 0.2782180000  |
| H              | 0.3249860000  | 2.6155660000  | 1.3410950000  | H             | -1.1630070000 | 2.3233160000  | -1.4417660000 |               |
| H              | 3.3291090000  | -0.1560960000 | 1.2503240000  |               |               |               |               |               |
| H              | -1.5846940000 | 3.3686420000  | 0.1625830000  |               |               |               |               |               |
| Betanidin      | C             | -1.5680150000 | 0.6336360000  | -1.0040060000 | C             | -1.6857590000 | 0.5334390000  | -1.0298510000 |
|                | C             | -2.5067740000 | 1.2837940000  | -0.0005260000 | C             | -2.6348100000 | 1.2849720000  | -0.1142070000 |
|                | N             | -3.8692130000 | 0.7914220000  | -0.2210550000 | N             | -3.9377690000 | 0.6398770000  | -0.1793130000 |
|                | C             | -3.9872160000 | -0.5703910000 | -0.4183780000 | C             | -4.0512560000 | -0.6649090000 | -0.2569690000 |
|                | C             | -2.9552880000 | -1.3941410000 | -0.7085630000 | C             | -2.9287020000 | -1.4962480000 | -0.4040480000 |
|                | C             | -1.6179260000 | -0.8634390000 | -0.8537290000 | C             | -1.6917200000 | -0.9439270000 | -0.7035360000 |
|                | C             | -0.5626850000 | -1.7006510000 | -0.9939680000 | C             | -0.5583880000 | -1.7538410000 | -0.9460840000 |
|                | C             | 0.8301680000  | -1.3508920000 | -1.0619530000 | C             | 0.7796390000  | -1.4183870000 | -0.9057540000 |
|                | N             | 1.4647280000  | -0.6021200000 | -0.2112460000 | N             | 1.3770020000  | -0.4176850000 | -0.2400280000 |
|                | C             | 0.9051090000  | -0.1037990000 | 1.0706440000  | C             | 0.8218250000  | 0.2176350000  | 0.9779340000  |
|                | C             | 2.1108140000  | 0.4774110000  | 1.8547870000  | C             | 2.0108860000  | 0.9889350000  | 1.6092980000  |
|                | C             | 3.2548250000  | 0.3246260000  | 0.8956590000  | C             | 3.1922790000  | 0.5665560000  | 0.7817450000  |
|                | C             | 4.5828660000  | 0.7000220000  | 1.0518610000  | C             | 4.5367630000  | 0.8717680000  | 0.9361060000  |
|                | C             | 5.4678420000  | 0.4533190000  | 0.0138380000  | C             | 5.4471360000  | 0.3839070000  | 0.0073430000  |
|                | C             | 5.0341840000  | -0.1610410000 | -1.1795920000 | C             | 5.0128720000  | -0.3940120000 | -1.0742060000 |
|                | C             | 3.7131340000  | -0.5341610000 | -1.3418330000 | C             | 3.6684470000  | -0.6975810000 | -1.2392280000 |
|                | C             | 2.8542150000  | -0.2854160000 | -0.2772810000 | C             | 2.7793570000  | -0.2189060000 | -0.2840400000 |
|                | O             | 5.9164930000  | -0.3842710000 | -2.1935550000 | O             | 5.9112780000  | -0.8577600000 | -1.9979200000 |
|                | O             | 6.7886490000  | 0.7791310000  | 0.0478500000  | O             | 6.7969040000  | 0.6255690000  | 0.0612850000  |
|                | C             | 0.2833480000  | -1.2573720000 | 1.8499050000  | C             | 0.2983450000  | -0.8442760000 | 1.9765830000  |
|                | O             | -0.6389260000 | -0.9081050000 | 2.7423040000  | O             | -0.6661810000 | -0.4784620000 | 2.6890190000  |
|                | O             | 0.6352650000  | -2.4017310000 | 1.7403870000  | O             | 0.9105100000  | -1.9328070000 | 2.0456760000  |
|                | C             | -5.3720880000 | -1.1442390000 | -0.3686860000 | C             | -5.4830340000 | -1.2264990000 | -0.1546280000 |
|                | O             | -5.5936050000 | -2.2991640000 | -0.1052140000 | O             | -5.5981930000 | -2.4633420000 | -0.2507470000 |
|                | O             | -6.3783690000 | -0.3087580000 | -0.6369150000 | O             | -6.3824320000 | -0.3762750000 | 0.0102500000  |
|                | C             | -2.5233440000 | 2.7985910000  | -0.1654280000 | C             | -2.7436530000 | 2.7856130000  | -0.4319150000 |
|                | O             | -3.0520880000 | 3.4964150000  | 0.8438340000  | O             | -3.8912530000 | 3.2844650000  | -0.4693700000 |
|                | O             | -2.1124880000 | 3.3694850000  | -1.1420720000 | O             | -1.6560590000 | 3.3851010000  | -0.5924530000 |
|                | H             | -0.5686190000 | 1.0568990000  | -0.9362740000 | H             | -0.6963840000 | 0.9765250000  | -1.0234180000 |
|                | H             | -1.9328960000 | 0.8583450000  | -2.0129420000 | H             | -2.0501130000 | 0.6083640000  | -2.0639900000 |
|                | H             | -2.1853170000 | 1.0480020000  | 1.0249640000  | H             | -2.2757230000 | 1.2071120000  | 0.9237590000  |
|                | H             | 2.2892800000  | -0.0792520000 | 2.7774610000  | H             | 2.1341510000  | 0.7331300000  | 2.6636910000  |
| H              | 1.9260680000  | 1.5191200000  | 2.1129760000  | H             | 1.8478760000  | 2.0656640000  | 1.5432280000  |               |
| H              | 4.9349480000  | 1.1799860000  | 1.9581950000  | H             | 4.8876540000  | 1.4823640000  | 1.7616220000  |               |
| H              | 3.3966960000  | -0.9911950000 | -2.2712470000 | H             | 3.3598110000  | -1.2772380000 | -2.1002960000 |               |
| H              | 6.7925940000  | -0.0662510000 | -1.9333880000 | H             | 6.7964940000  | -0.5467880000 | -1.7633540000 |               |
| H              | 7.0131420000  | 1.2114780000  | 0.8824710000  | H             | 7.0033720000  | 1.2002710000  | 0.8092390000  |               |

|               |   |               |               |               |   |               |               |               |
|---------------|---|---------------|---------------|---------------|---|---------------|---------------|---------------|
| Betaxanthin   | H | 0.1663320000  | 0.6719210000  | 0.8830750000  | H | 0.0170490000  | 0.9068760000  | 0.7459290000  |
|               | H | -0.8373500000 | 0.0409280000  | 2.7199100000  | H | -4.7762260000 | 1.2049760000  | -0.0689340000 |
|               | H | -6.0644810000 | 0.5563050000  | -0.9426300000 | H | -3.0617160000 | -2.5659710000 | -0.3204860000 |
|               | H | -3.2810170000 | 2.9376350000  | 1.6021260000  | H | -0.7506900000 | -2.7889880000 | -1.2106920000 |
|               | H | -4.5466600000 | 1.1771440000  | 0.4339750000  | H | 1.4718500000  | -2.0989870000 | -1.3941050000 |
|               | H | -3.1416390000 | -2.4509300000 | -0.8489460000 |   |               |               |               |
|               | H | -0.7530260000 | -2.7606810000 | -1.1436610000 |   |               |               |               |
|               | H | 1.4448970000  | -1.8137110000 | -1.8294360000 |   |               |               |               |
|               |   |               |               |               |   |               |               |               |
|               | C | -0.0482300000 | -2.3381910000 | -1.0961370000 | C | 0.0439580000  | -2.3050470000 | -1.0590020000 |
|               | O | -1.1666120000 | -2.6072180000 | -0.2534740000 | O | -1.0688070000 | -2.6118470000 | -0.2203750000 |
|               | C | -2.1323660000 | -1.6429440000 | -0.1861680000 | C | -2.0537150000 | -1.6688080000 | -0.1322150000 |
|               | C | -3.1759640000 | -1.9178200000 | 0.7080520000  | C | -3.0749290000 | -1.9702680000 | 0.7791550000  |
|               | C | -4.2118100000 | -1.0127080000 | 0.8558300000  | C | -4.1289490000 | -1.0902200000 | 0.9483620000  |
|               | C | -4.2124680000 | 0.1725730000  | 0.1213990000  | C | -4.1714870000 | 0.0957320000  | 0.2162680000  |
|               | C | -3.1818330000 | 0.4634270000  | -0.7689700000 | C | -3.1636350000 | 0.4132850000  | -0.6909580000 |
|               | C | -2.1400270000 | -0.4613700000 | -0.9187830000 | C | -2.1011490000 | -0.4846780000 | -0.8596380000 |
|               | C | -3.1868840000 | 1.7639200000  | -1.5441730000 | C | -3.2184550000 | 1.7113630000  | -1.4678000000 |
|               | C | -3.0587760000 | 3.0000470000  | -0.6459980000 | C | -3.1176920000 | 2.9557300000  | -0.5759230000 |
|               | N | -1.8640730000 | 3.1309030000  | 0.1877790000  | N | -1.9211560000 | 3.1223780000  | 0.2505700000  |
|               | C | -0.8109950000 | 2.4963010000  | -0.1560020000 | C | -0.8499910000 | 2.5266130000  | -0.1149900000 |
|               | C | 0.3957060000  | 2.5323830000  | 0.6583870000  | C | 0.3764240000  | 2.5810460000  | 0.6593190000  |
|               | C | 1.5159280000  | 1.8330650000  | 0.3834090000  | C | 1.4975700000  | 1.8843870000  | 0.3488430000  |
| Indicaxanthin | C | 2.7068270000  | 1.8619840000  | 1.3074030000  | C | 2.7148020000  | 1.9553520000  | 1.2402510000  |
|               | C | 3.2667050000  | 0.4424490000  | 1.4745480000  | C | 3.3700480000  | 0.5762570000  | 1.3528520000  |
|               | N | 3.6545800000  | -0.0872290000 | 0.1795960000  | N | 3.7206890000  | 0.1193380000  | 0.0189670000  |
|               | C | 2.7317910000  | 0.1168720000  | -0.8458640000 | C | 2.7284350000  | 0.2027900000  | -0.9275740000 |
|               | C | 1.7111800000  | 0.9968080000  | -0.7936490000 | C | 1.6585280000  | 1.0294260000  | -0.8128400000 |
|               | C | 2.9427950000  | -0.6531850000 | -2.1099200000 | C | 2.8675800000  | -0.7499550000 | -2.1136500000 |
|               | O | 2.0690210000  | -0.8489650000 | -2.9203680000 | O | 2.0652610000  | -0.6144000000 | -3.0666680000 |
|               | O | 4.1702690000  | -1.1383480000 | -2.3309300000 | O | 3.7726470000  | -1.6159690000 | -2.0234980000 |
|               | C | 2.2358130000  | -0.4682000000 | 2.1473770000  | C | 2.4519710000  | -0.4195450000 | 2.1143010000  |
|               | O | 1.8657090000  | -0.1263000000 | 3.3870250000  | O | 2.0724790000  | -0.0409550000 | 3.2526160000  |
|               | O | 1.7612230000  | -1.4497160000 | 1.6328750000  | O | 2.1787360000  | -1.5183430000 | 1.5782400000  |
|               | O | -3.1764630000 | -3.0812950000 | 1.4358510000  | O | -3.0363830000 | -3.1359580000 | 1.5029620000  |
|               | H | 0.4324730000  | -1.4057600000 | -0.7966120000 | H | 0.5045260000  | -1.3680710000 | -0.7423340000 |
|               | H | -0.3615330000 | -2.2803800000 | -2.1413230000 | H | -0.2714200000 | -2.2362160000 | -2.1030960000 |
|               | H | 0.6406980000  | -3.1697700000 | -0.9631310000 | H | 0.7493070000  | -3.1250800000 | -0.9410860000 |
|               | H | -5.0141750000 | -1.2449190000 | 1.5467450000  | H | -4.9122380000 | -1.3425620000 | 1.6539930000  |
|               | H | -5.0315920000 | 0.8730670000  | 0.2454050000  | H | -5.0050560000 | 0.7760790000  | 0.3553500000  |
|               | H | -1.3357190000 | -0.2507340000 | -1.6145340000 | H | -1.3115750000 | -0.2514730000 | -1.5654080000 |
|               | H | -4.1389840000 | 1.8670230000  | -2.0723750000 | H | -4.1796200000 | 1.7823290000  | -1.9851550000 |
|               | H | -2.4094230000 | 1.7473190000  | -2.3112840000 | H | -2.4508410000 | 1.7151090000  | -2.2447740000 |
|               | H | -3.1341860000 | 3.9010810000  | -1.2624790000 | H | -3.2253960000 | 3.8482520000  | -1.2004080000 |
|               | H | -3.9164340000 | 3.0314430000  | 0.0299040000  | H | -3.9737280000 | 2.9649470000  | 0.1028910000  |
|               | H | -0.7748500000 | 1.8883010000  | -1.0587410000 | H | -0.8173960000 | 1.9319530000  | -1.0269940000 |
|               | H | 0.3574700000  | 3.1262430000  | 1.5670710000  | H | 0.3638440000  | 3.1785000000  | 1.5664850000  |
|               | H | 2.4471680000  | 2.2994520000  | 2.2713410000  | H | 2.4528530000  | 2.3322330000  | 2.2277110000  |
|               | H | 3.5009310000  | 2.4712310000  | 0.8664570000  | H | 3.4415800000  | 2.6437280000  | 0.7957700000  |
|               | H | 3.9533340000  | -1.0573150000 | 0.2503590000  | H | 4.2070940000  | -0.7689150000 | -0.0193670000 |
|               | H | 1.0736470000  | 1.0855210000  | -1.6630360000 | H | 0.9231510000  | 1.0109910000  | -1.6045520000 |
|               | H | -2.3774740000 | -3.5816990000 | 1.2193610000  | H | -2.2216720000 | -3.6092280000 | 1.2837880000  |
|               | H | 4.1426250000  | 0.4702870000  | 2.1264830000  | H | 4.2825190000  | 0.6644370000  | 1.9456380000  |
|               | H | 4.8102090000  | -0.8340080000 | -1.6697770000 |   |               |               |               |
|               | H | 2.3327470000  | 0.6601780000  | 3.7062680000  |   |               |               |               |
|               |   |               |               |               |   |               |               |               |
|               | C | -4.7364540000 | -0.7071900000 | -0.5120730000 | C | 4.6861500000  | -0.6552970000 | 0.6146980000  |
|               | C | -3.6034630000 | -0.7673150000 | -1.5420070000 | C | 3.5159420000  | -0.6026410000 | 1.6052700000  |
|               | C | -2.3752920000 | -0.3800840000 | -0.7014570000 | C | 2.3228460000  | -0.2718590000 | 0.6941700000  |
|               | N | -2.6295960000 | -1.1422650000 | 0.5314530000  | N | 2.6063870000  | -1.1324560000 | -0.4594100000 |
|               | C | -1.7890950000 | -1.9197370000 | 1.1389890000  | C | 1.7880650000  | -2.0230610000 | -0.9783780000 |
|               | C | -0.3952990000 | -2.1275910000 | 0.8552160000  | C | 0.4068310000  | -2.1997130000 | -0.8022030000 |
|               | C | 0.5918150000  | -1.2312510000 | 0.6225050000  | C | -0.5948670000 | -1.2745130000 | -0.5175740000 |
|               | C | 0.5090580000  | 0.2400260000  | 0.9066100000  | C | -0.4703920000 | 0.1863790000  | -0.8844270000 |
|               | C | 1.2578370000  | 1.0554080000  | -0.1533910000 | C | -1.2922620000 | 1.0704250000  | 0.0378010000  |
|               | N | 2.6298160000  | 0.5735750000  | -0.2702910000 | N | -2.6436260000 | 0.5409410000  | 0.1291240000  |
|               | C | 2.8352950000  | -0.7918740000 | -0.1731670000 | C | -2.8752080000 | -0.7617310000 | 0.1276740000  |

## Vulgaxanthin I

|   |               |               |               |   |               |               |               |
|---|---------------|---------------|---------------|---|---------------|---------------|---------------|
| C | 1.9104200000  | -1.6836820000 | 0.2390720000  | C | -1.8710540000 | -1.6931290000 | -0.1038870000 |
| C | 4.2181280000  | -1.2806370000 | -0.4902970000 | C | -4.3251070000 | -1.1850390000 | 0.4206820000  |
| O | 4.4453440000  | -2.4014950000 | -0.8692090000 | O | -4.5394590000 | -2.4106740000 | 0.5147070000  |
| O | 5.2135420000  | -0.4067950000 | -0.3252990000 | O | -5.1514620000 | -0.2540670000 | 0.5376370000  |
| C | 1.2296090000  | 2.5122790000  | 0.2885410000  | C | -1.3327540000 | 2.5494840000  | -0.3931140000 |
| O | 2.3204820000  | 2.9867210000  | 0.8856980000  | O | -2.3956810000 | 3.1731760000  | -0.1599310000 |
| O | 0.2506450000  | 3.2019220000  | 0.1485780000  | O | -0.2911140000 | 3.0140740000  | -0.9063250000 |
| C | -4.1067760000 | -1.2505130000 | 0.7744510000  | C | 4.0710690000  | -1.2392060000 | -0.6667300000 |
| C | -2.3596150000 | 1.1420350000  | -0.5410200000 | C | 2.3392920000  | 1.2407930000  | 0.3755100000  |
| O | -2.6789970000 | 1.7060930000  | 0.6234040000  | O | 2.7789260000  | 1.6138270000  | -0.7355120000 |
| O | -2.1012660000 | 1.8315400000  | -1.4932400000 | O | 1.9380440000  | 1.9768170000  | 1.3081710000  |
| H | -5.5984260000 | -1.3011720000 | -0.8079390000 | H | 5.5096690000  | -1.2694180000 | 0.9754460000  |
| H | -5.0601270000 | 0.3253990000  | -0.3689970000 | H | 5.0639420000  | 0.3506040000  | 0.4272040000  |
| H | -3.7404860000 | -0.0935720000 | -2.3850030000 | H | 3.6462990000  | 0.1410160000  | 2.3900890000  |
| H | -3.4567470000 | -1.7833570000 | -1.9102870000 | H | 3.3522410000  | -1.5790170000 | 2.0656910000  |
| H | -0.1278590000 | -3.1810050000 | 0.8909180000  | H | 0.0926130000  | -3.2315680000 | -0.9287300000 |
| H | 1.0058980000  | 0.3916300000  | 1.8734210000  | H | -0.8679120000 | 0.2669710000  | -1.9055810000 |
| H | -0.5055880000 | 0.6060300000  | 1.0204340000  | H | 0.5552350000  | 0.5331270000  | -0.9353280000 |
| H | 3.1307940000  | 1.0039270000  | -1.0461950000 | H | -3.4087220000 | 1.1807300000  | 0.3153520000  |
| H | 2.1646540000  | -2.7347120000 | 0.2832550000  | H | -2.0986120000 | -2.7436880000 | 0.0100970000  |
| H | -4.3635700000 | -0.6740620000 | 1.6629830000  | H | 4.3566430000  | -0.6823730000 | -1.5587930000 |
| H | -4.3283670000 | -2.3020200000 | 0.9475240000  | H | 4.3165200000  | -2.2915320000 | -0.8115240000 |
| H | 0.7306740000  | 0.9950330000  | -1.1119810000 | H | -0.8443410000 | 1.0524260000  | 1.0438060000  |
| H | -1.4238460000 | -0.6786400000 | -1.1428240000 | H | 1.3610120000  | -0.5444220000 | 1.1298760000  |
| H | -2.2444650000 | -2.5852750000 | 1.8703650000  | H | 2.3007450000  | -2.7928220000 | -1.5525340000 |
| H | 4.9150760000  | 0.4169510000  | 0.0916770000  |   |               |               |               |
| H | 3.0062230000  | 2.2968480000  | 0.9275570000  |   |               |               |               |
| H | -2.8204070000 | 1.0756940000  | 1.3456700000  |   |               |               |               |
|   |               |               |               |   |               |               |               |
| C | -2.9242970000 | -1.5888030000 | 0.0007000000  | C | -2.9059900000 | -1.6403610000 | -0.0145690000 |
| C | -3.6944720000 | -0.3498330000 | -0.4734200000 | C | -3.6980410000 | -0.3991230000 | -0.4167050000 |
| N | -3.2509250000 | 0.8199910000  | 0.2693100000  | N | -3.2251050000 | 0.7298440000  | 0.3648920000  |
| C | -1.8742400000 | 0.9748280000  | 0.3388140000  | C | -1.8768990000 | 0.9337830000  | 0.3976340000  |
| C | -0.9854710000 | -0.0214760000 | 0.1390160000  | C | -0.9770290000 | -0.0516450000 | 0.1328620000  |
| C | -1.4368050000 | -1.3718410000 | -0.1501190000 | C | -1.4155060000 | -1.4025000000 | -0.1558220000 |
| C | -0.6311400000 | -2.3949790000 | -0.5036580000 | C | -0.6053220000 | -2.4301750000 | -0.5155420000 |
| C | 0.8266840000  | -2.3537150000 | -0.6410170000 | C | 0.8487200000  | -2.3886180000 | -0.6551960000 |
| N | 1.5869400000  | -1.6262070000 | 0.0777780000  | N | 1.6135310000  | -1.6056080000 | -0.0002510000 |
| C | 2.9924090000  | -1.6270380000 | -0.2715710000 | C | 3.0192120000  | -1.5964730000 | -0.3545240000 |
| C | 3.3598140000  | -0.2925090000 | -0.9522500000 | C | 3.3538950000  | -0.2276120000 | -0.9719930000 |
| C | 3.1717180000  | 0.9215140000  | -0.0384330000 | C | 3.2040800000  | 0.9201990000  | 0.0348280000  |
| C | 3.4450250000  | 2.1907110000  | -0.8106440000 | C | 3.3241600000  | 2.2471610000  | -0.6720170000 |
| O | 4.5375440000  | 2.3816110000  | -1.3587850000 | O | 4.3592950000  | 2.5598510000  | -1.2782790000 |
| N | 2.4432450000  | 3.0756030000  | -0.8801110000 | N | 2.2507520000  | 3.0453530000  | -0.6335600000 |
| C | 3.8445620000  | -1.8146750000 | 0.9734280000  | C | 3.9481620000  | -1.8511260000 | 0.8508710000  |
| O | 3.4409790000  | -1.7732930000 | 2.1089060000  | O | 3.4640400000  | -1.9103350000 | 2.0054300000  |
| O | 5.1530970000  | -2.0195220000 | 0.7545320000  | O | 5.1703090000  | -1.9741440000 | 0.5678520000  |
| C | -1.3474820000 | 2.3112560000  | 0.7551990000  | C | -1.4265440000 | 2.3509100000  | 0.7448350000  |
| O | -0.2209830000 | 2.6814770000  | 0.5194480000  | O | -0.1959170000 | 2.5505020000  | 0.8987000000  |
| O | -2.1752860000 | 3.1182700000  | 1.4245940000  | O | -2.3309480000 | 3.2118000000  | 0.8442240000  |
| C | -5.1881030000 | -0.5295780000 | -0.2821690000 | C | -5.2169250000 | -0.5843830000 | -0.2893310000 |
| O | -5.8522050000 | 0.0901540000  | 0.5096330000  | O | -5.8779130000 | 0.3320570000  | 0.2551480000  |
| O | -5.7728710000 | -1.4445260000 | -1.0627950000 | O | -5.6904100000 | -1.6381870000 | -0.7840970000 |
| H | -3.2412620000 | -2.4725920000 | -0.5536280000 | H | -3.2183940000 | -2.4952870000 | -0.6127630000 |
| H | -3.1507400000 | -1.7501530000 | 1.0607170000  | H | -3.1245830000 | -1.8656310000 | 1.0370500000  |
| H | -3.7539900000 | 1.6581440000  | -0.0108400000 | H | -3.7975550000 | 1.5643290000  | 0.3570450000  |
| H | 0.0657810000  | 0.1933020000  | 0.2446730000  | H | 0.0738420000  | 0.1833570000  | 0.1686000000  |
| H | -1.0930800000 | -3.3388570000 | -0.7781150000 | H | -1.0708720000 | -3.3704260000 | -0.7968820000 |
| H | 1.2432510000  | -3.0154960000 | -1.4103560000 | H | 1.2705280000  | -3.0983010000 | -1.3807060000 |
| H | 3.2471340000  | -2.4410210000 | -0.9638340000 | H | 3.2513280000  | -2.3698680000 | -1.0991870000 |
| H | 2.7183050000  | -0.2017220000 | -1.8327270000 | H | 2.6772120000  | -0.0665840000 | -1.8170350000 |
| H | 4.3935910000  | -0.3332540000 | -1.3027020000 | H | 4.3735240000  | -0.2469890000 | -1.3609150000 |
| H | 2.1665990000  | 0.9413510000  | 0.3847170000  | H | 2.2471860000  | 0.8524760000  | 0.5545900000  |
| H | 3.8897520000  | 0.8884870000  | 0.7877210000  | H | 4.0043980000  | 0.8694060000  | 0.7799490000  |
| H | 1.5550000000  | 2.9041980000  | -0.4251900000 | H | 1.4090120000  | 2.7936720000  | -0.1198130000 |
| H | 2.5842860000  | 3.9422180000  | -1.3818760000 | H | 2.2926390000  | 3.9385450000  | -1.1060870000 |
| H | -3.5154030000 | -0.2154530000 | -1.5497970000 | H | -3.5059890000 | -0.2084040000 | -1.4852290000 |
| H | 5.3593060000  | -2.0737030000 | -0.1905210000 |   |               |               |               |

|                 |   |               |               |               |   |               |               |
|-----------------|---|---------------|---------------|---------------|---|---------------|---------------|
| Vulgaxanthin II | H | -3.0044080000 | 2.6806390000  | 1.6708250000  |   |               |               |
|                 | H | -5.1503530000 | -1.8483550000 | -1.6854240000 |   |               |               |
|                 |   |               |               |               |   |               |               |
|                 | C | -3.1016310000 | -0.8214210000 | -1.5886770000 | C | -3.1065340000 | -0.9048210000 |
|                 | C | -3.9319400000 | -0.1223740000 | -0.5023210000 | C | -3.9883860000 | -0.1787330000 |
|                 | N | -3.3968390000 | 1.2012300000  | -0.2743750000 | N | -3.4659030000 | 1.1623110000  |
|                 | C | -2.0274880000 | 1.2848030000  | -0.1184480000 | C | -2.1173980000 | 1.2739150000  |
|                 | C | -1.1615340000 | 0.3301910000  | -0.5277630000 | C | -1.2277180000 | 0.2989480000  |
|                 | C | -1.6435630000 | -0.8652000000 | -1.1975890000 | C | -1.6624350000 | -0.9173640000 |
|                 | C | -0.8747950000 | -1.9221910000 | -1.5377320000 | C | -0.8715240000 | -1.9781170000 |
|                 | C | 0.5619420000  | -2.0679460000 | -1.3068800000 | C | 0.5612680000  | -2.1107300000 |
|                 | N | 1.1858350000  | -1.5558790000 | -0.3187380000 | N | 1.2206210000  | -1.4874570000 |
|                 | C | 2.6265260000  | -1.7023370000 | -0.3368480000 | C | 2.6621470000  | -1.6602700000 |
|                 | C | 3.2768510000  | -0.3698200000 | -0.7660900000 | C | 3.3209250000  | -0.3475940000 |
|                 | C | 3.0066390000  | 0.7621450000  | 0.2352530000  | C | 3.0888980000  | 0.8186280000  |
|                 | C | 3.4535890000  | 2.0915680000  | -0.3068510000 | C | 3.7418030000  | 2.0970550000  |
|                 | O | 4.4075200000  | 2.7131940000  | 0.0994830000  | O | 4.9952530000  | 2.0870360000  |
|                 | O | 2.7340010000  | 2.6071300000  | -1.3197740000 | O | 3.0006740000  | 3.0813230000  |
|                 | C | 3.1351190000  | -2.0909460000 | 1.0410440000  | C | 3.2454230000  | -2.0729250000 |
|                 | O | 2.4929940000  | -2.0295860000 | 2.0594700000  | O | 2.5008380000  | -2.1279900000 |
|                 | O | 4.4119400000  | -2.4993320000 | 1.0970080000  | O | 4.4795970000  | -2.3322730000 |
|                 | C | -1.5854210000 | 2.5261900000  | 0.5911330000  | C | -1.6657110000 | 2.5786870000  |
|                 | O | -0.2980370000 | 2.8708430000  | 0.5488800000  | O | -0.4344920000 | 2.7890420000  |
|                 | O | -2.3688450000 | 3.2119760000  | 1.2060440000  | O | -2.5814110000 | 3.3379740000  |
|                 | C | -3.9486420000 | -0.9361560000 | 0.7952300000  | C | -4.1129710000 | -0.9826970000 |
|                 | O | -4.5286840000 | -2.1415900000 | 0.7343300000  | O | -4.4583720000 | -2.1856250000 |
|                 | O | -3.4886160000 | -0.5512400000 | 1.8407090000  | O | -3.9063990000 | -0.3921360000 |
|                 | H | -3.2121570000 | -0.2321110000 | -2.5033230000 | H | -3.1692930000 | -0.3633290000 |
|                 | H | -3.4811600000 | -1.8229790000 | -1.7919010000 | H | -3.4731030000 | -1.9162830000 |
|                 | H | -3.9123570000 | 1.7632170000  | 0.3945730000  | H | -4.0116870000 | 1.7702710000  |
|                 | H | 1.0925710000  | -2.6746660000 | -2.0511230000 | H | 1.0754370000  | -2.8159190000 |
|                 | H | 2.9556990000  | -2.4765430000 | -1.0417560000 | H | 2.9562230000  | -2.4476930000 |
|                 | H | 2.8654510000  | -0.1287290000 | -1.7491570000 | H | 2.9156570000  | -0.0979380000 |
|                 | H | 4.3541530000  | -0.5096920000 | -0.8828710000 | H | 4.3928480000  | -0.5190070000 |
|                 | H | 3.5424170000  | 0.5913340000  | 1.1695050000  | H | 3.5369120000  | 0.5825990000  |
|                 | H | 1.9374230000  | 0.8275960000  | 0.4530100000  | H | 2.0213680000  | 0.9883760000  |
|                 | H | -4.9677560000 | -0.0406580000 | -0.8380930000 | H | -5.0015520000 | -0.1035310000 |
|                 | H | -0.1006920000 | 0.4277600000  | -0.3496230000 | H | -0.1817360000 | 0.4509090000  |
|                 | H | -1.3343610000 | -2.7244180000 | -2.1075820000 | H | -1.3163200000 | -2.7951370000 |
|                 | H | 1.9954660000  | 2.0310030000  | -1.5674510000 |   |               |               |
|                 | H | 4.8186140000  | -2.5544110000 | 0.2192060000  |   |               |               |
|                 | H | 0.2218360000  | 2.2998580000  | -0.0345890000 |   |               |               |
|                 | H | -4.9102140000 | -2.3242220000 | -0.1370650000 |   |               |               |
